# Supplementary material for: Genetic diversity for drought and low-phosphorus tolerance in rice (Oryza sativa L.) varieties and donors adapted to rainfed drought-prone ecologies
Source: PubMed Central journal article supplement (PMC8249610; doi:10.1038/s41598-021-93325-2), 2021-07-01
Supplement: 41598_2021_93325_MOESM1_ESM.pdf [file 41598_2021_93325_MOESM1_ESM.pdf]

# **Genetic diversity for drought and low-Phosphorus tolerance in rice (*Oryza sativa* L.) varieties and donors adapted to rainfed drought-prone ecologies**

Somnath Roy<sup>1\*</sup>, B. C. Verma<sup>1</sup>, Amrita Banerjee<sup>1</sup>, J. Kumar<sup>1</sup>,  
Uday Sankar Ray<sup>2</sup>, N. P. Mandal<sup>1\*</sup>

<sup>1</sup>*Central Rainfed Upland Rice Research Station, ICAR-National Rice Research Institute, Hazaribag 825301, Jharkhand, India*

<sup>2</sup>*Zonal Drought Resistant Paddy Research Station, Hathwara, Purulia 723147, West Bengal, India*

\*e-mail:

S Roy: [somnath.roy@icar.gov.in](mailto:somnath.roy@icar.gov.in); [sroypbr@gmail.com](mailto:sroypbr@gmail.com)

NP Mandal: [npmandal@hotmail.com](mailto:npmandal@hotmail.com)

**Table S1** Diversity statistics of the DTY QTL-linked SSR markers

| #  | DTY QTL                         | Marker      | MAF         | Na          | H <sub>e</sub> | PIC         |
|----|---------------------------------|-------------|-------------|-------------|----------------|-------------|
| 1  | <i>qDTY</i> <sub>1.1</sub>      | RM431       | 0.44        | 3           | 0.63           | 0.56        |
| 2  | <i>qDTY</i> <sub>1.1</sub>      | RM11943     | 0.41        | 3           | 0.66           | 0.58        |
| 3  | <i>qDTY</i> <sub>1.1</sub>      | RM12091     | 0.50        | 4           | 0.66           | 0.60        |
| 4  | <i>qDTY</i> <sub>1.2</sub>      | RM259       | 0.56        | 4           | 0.58           | 0.51        |
| 5  | <i>qDTY</i> <sub>1.2, 1.3</sub> | RM315       | 0.63        | 3           | 0.52           | 0.45        |
| 6  | <i>qDTY</i> <sub>1.3</sub>      | RM488       | 0.41        | 3           | 0.63           | 0.56        |
| 7  | <i>qDTY</i> <sub>2.1</sub>      | RM327       | 0.41        | 4           | 0.67           | 0.61        |
| 8  | <i>qDTY</i> <sub>2.1</sub>      | RM262       | 0.34        | 5           | 0.74           | 0.70        |
| 9  | <i>qDTY</i> <sub>2.2</sub>      | RM211       | 0.41        | 5           | 0.73           | 0.69        |
| 10 | <i>qDTY</i> <sub>2.2, 2.3</sub> | RM263       | 0.50        | 4           | 0.63           | 0.57        |
| 11 | <i>qDTY</i> <sub>2.2</sub>      | RM279       | 0.84        | 4           | 0.28           | 0.27        |
| 12 | <i>qDTY</i> <sub>2.2</sub>      | RM555       | 0.38        | 4           | 0.68           | 0.61        |
| 13 | <i>qDTY</i> <sub>2.3</sub>      | RM573       | 0.47        | 4           | 0.65           | 0.59        |
| 14 | <i>qDTY</i> <sub>2.3</sub>      | RM3212      | 0.47        | 4           | 0.65           | 0.59        |
| 15 | <i>qDTY</i> <sub>2.3</sub>      | RM250       | 0.41        | 4           | 0.67           | 0.60        |
| 16 | <i>qDTY</i> <sub>3.1</sub>      | RM 520      | 0.38        | 4           | 0.70           | 0.64        |
| 17 | <i>qDTY</i> <sub>3.1</sub>      | RM416       | 0.63        | 3           | 0.49           | 0.40        |
| 18 | <i>qDTY</i> <sub>3.2</sub>      | RM 60       | 0.81        | 3           | 0.32           | 0.29        |
| 19 | <i>qDTY</i> <sub>3.2</sub>      | RM22        | 0.56        | 3           | 0.58           | 0.51        |
| 20 | <i>qDTY</i> <sub>6.1</sub>      | RM589       | 0.38        | 3           | 0.66           | 0.59        |
| 21 | <i>qDTY</i> <sub>6.1</sub>      | RM204       | 0.41        | 5           | 0.72           | 0.68        |
| 22 | <i>qDTY</i> <sub>12.1</sub>     | RM28166     | 0.44        | 4           | 0.66           | 0.60        |
| 23 | <i>qDTY</i> <sub>12.1</sub>     | RM28199     | 0.69        | 2           | 0.43           | 0.34        |
| 24 | <i>qDTY</i> <sub>12.1</sub>     | RM28048     | 0.50        | 3           | 0.53           | 0.42        |
|    |                                 | <b>Mean</b> | <b>0.50</b> | <b>3.67</b> | <b>0.60</b>    | <b>0.54</b> |

MAF, major allele frequency; Na, number of alleles; H<sub>e</sub>, gene diversity; PIC, polymorphism information content

**Table S2** Analysis of variance for root length, shoot dry weight and root dry weight in lowP and highP experiments in completely randomized design

| Source                                     | df  | MS        | F (DFn, DFd)        | P value  |
|--------------------------------------------|-----|-----------|---------------------|----------|
| <b>Root length (all genotype)</b>          |     |           |                     |          |
| Interaction                                | 30  | 2.610     | F (30, 124) = 9.949 | P<0.0001 |
| Genotype                                   | 30  | 9.812     | F (30, 124) = 37.41 | P<0.0001 |
| Treatment                                  | 1   | 59.42     | F (1, 124) = 226.5  | P<0.0001 |
| Residual                                   | 124 | 0.2623    |                     |          |
| <b>Root length (-PSTOL1 genotype)</b>      |     |           |                     |          |
| Interaction                                | 11  | 3.158     | F (11, 48) = 11.12  | P<0.0001 |
| Genotype                                   | 11  | 7.031     | F (11, 48) = 24.75  | P<0.0001 |
| Treatment                                  | 1   | 0.7462    | F (1, 48) = 2.626   | P=0.1117 |
| Residual                                   | 48  | 0.2841    |                     |          |
| <b>Root length (+PSTOL1 genotype)</b>      |     |           |                     |          |
| Interaction                                | 18  | 1.018     | F (18, 76) = 4.096  | P<0.0001 |
| Genotype                                   | 18  | 9.662     | F (18, 76) = 38.88  | P<0.0001 |
| Treatment                                  | 1   | 83.90     | F (1, 76) = 337.6   | P<0.0001 |
| Residual                                   | 76  | 0.2485    |                     |          |
| <b>Shoot dry weight (all genotype)</b>     |     |           |                     |          |
| Interaction                                | 30  | 0.002753  | F (30, 124) = 8.850 | P<0.0001 |
| Genotype                                   | 30  | 0.006077  | F (30, 124) = 19.53 | P<0.0001 |
| Treatment                                  | 1   | 0.4255    | F (1, 124) = 1368   | P<0.0001 |
| Residual                                   | 124 | 0.0003111 |                     |          |
| <b>Shoot dry weight (-PSTOL1 genotype)</b> |     |           |                     |          |
| Interaction                                | 11  | 0.002685  | F (11, 48) = 7.963  | P<0.0001 |
| Genotype                                   | 11  | 0.007676  | F (11, 48) = 22.76  | P<0.0001 |
| Treatment                                  | 1   | 0.1313    | F (1, 48) = 389.2   | P<0.0001 |
| Residual                                   | 48  | 0.0003372 |                     |          |
| <b>Shoot dry weight (+PSTOL1 genotype)</b> |     |           |                     |          |
| Interaction                                | 18  | 0.002775  | F (18, 76) = 9.421  | P<0.0001 |
| Genotype                                   | 18  | 0.003611  | F (18, 76) = 12.26  | P<0.0001 |
| Treatment                                  | 1   | 0.2974    | F (1, 76) = 1010    | P<0.0001 |
| Residual                                   | 76  | 0.0002946 |                     |          |
| <b>Root dry weight (all genotype)</b>      |     |           |                     |          |
| Interaction                                | 30  | 0.03106   | F (30, 124) = 5.153 | P<0.0001 |
| Genotype                                   | 30  | 0.2926    | F (30, 124) = 48.54 | P<0.0001 |
| Treatment                                  | 1   | 3.258     | F (1, 124) = 540.4  | P<0.0001 |
| Residual                                   | 124 | 0.006028  |                     |          |
| <b>Root dry weight (-PSTOL1 genotype)</b>  |     |           |                     |          |
| Interaction                                | 11  | 0.02584   | F (11, 48) = 7.997  | P<0.0001 |
| Genotype                                   | 11  | 0.2326    | F (11, 48) = 71.99  | P<0.0001 |
| Treatment                                  | 1   | 0.8262    | F (1, 48) = 255.8   | P<0.0001 |
| Residual                                   | 48  | 0.003230  |                     |          |
| <b>Root dry weight (+PSTOL1 genotype)</b>  |     |           |                     |          |
| Interaction                                | 18  | 0.03182   | F (18, 76) = 4.083  | P<0.0001 |
| Genotype                                   | 18  | 0.2605    | F (18, 76) = 33.42  | P<0.0001 |
| Treatment                                  | 1   | 2.506     | F (1, 76) = 321.5   | P<0.0001 |
| Residual                                   | 76  | 0.007794  |                     |          |

**Table S3** DTY QTL positive genotypes identified through QTL-linked SSR markers

| Serial No. | Genotype      | qDTY |     |     |     |     |     |     |     |     |      |    |
|------------|---------------|------|-----|-----|-----|-----|-----|-----|-----|-----|------|----|
|            |               | 1.1  | 1.2 | 1.3 | 2.1 | 2.2 | 2.3 | 3.1 | 3.2 | 6.1 | 12.1 |    |
| 1          | Abhishek      | -    | -   | -   | -   | -   | -   | -   | -   | -   | √    | -  |
| 2          | Anjali        | -    | -   | -   | -   | -   | -   | -   | -   | -   | -    | -  |
| 3          | Annada        | -    | -   | -   | -   | -   | -   | -   | -   | -   | -    | -  |
| 4          | Apo           | -    | -   | -   | PC  | -   | -   | PC  | -   | √   | -    | -  |
| 5          | ASD16         | -    | -   | -   | -   | -   | -   | -   | -   | -   | -    | -  |
| 6          | Bala          | -    | -   | -   | -   | -   | -   | -   | -   | -   | -    | -  |
| 7          | CR Dhan 103   | -    | -   | -   | √   | -   | √   | -   | -   | -   | -    | -  |
| 8          | CR Dhan 40    | -    | -   | -   | -   | -   | -   | -   | -   | -   | -    | -  |
| 9          | Dular         | -    | √   | √   | -   | -   | -   | -   | -   | -   | -    | -  |
| 10         | Heera         | -    | -   | -   | -   | -   | -   | -   | -   | -   | -    | -  |
| 11         | Kalinga III   | -    | -   | -   | -   | -   | -   | -   | -   | -   | -    | -  |
| 12         | Nagina 22     | PC*  | -   | -   | -   | -   | -   | -   | PC  | -   | -    | -  |
| 13         | Poornima      | -    | -   | -   | -   | -   | -   | -   | √   | √   | -    | -  |
| 14         | Rasi          | -    | -   | -   | -   | -   | -   | -   | -   | -   | -    | -  |
| 15         | Sadabahr      | -    | -   | -   | -   | -   | -   | -   | -   | -   | -    | -  |
| 16         | Sahbhagi Dhan | -    | -   | -   | √   | -   | -   | -   | -   | -   | -    | √  |
| 17         | Sattari       | -    | -   | -   | -   | -   | -   | -   | -   | -   | -    | -  |
| 18         | Shusk Samrat  | -    | -   | -   | -   | -   | -   | -   | -   | -   | -    | -  |
| 19         | Swarna        | -    | -   | -   | -   | -   | -   | -   | -   | -   | -    | -  |
| 20         | UPLRI7        | -    | -   | -   | -   | -   | -   | -   | -   | -   | -    | √  |
| 21         | Vanaprabha    | -    | -   | -   | -   | -   | -   | -   | -   | -   | -    | -  |
| 22         | Vandana       | -    | -   | √   | -   | -   | √   | -   | √   | PC  | -    | -  |
| 23         | Virendra      | -    | -   | -   | -   | -   | -   | -   | -   | -   | -    | -  |
| 24         | Way Rarem     | -    | -   | -   | -   | -   | -   | -   | -   | -   | -    | PC |
| 25         | Bhutmuri      | -    | √   | √   | -   | -   | -   | -   | -   | -   | -    | -  |
| 26         | AUS 257       | -    | √   | √   | -   | √   | -   | -   | -   | -   | -    | -  |
| 27         | Black gora    | -    | -   | -   | -   | √   | -   | -   | -   | -   | -    | -  |
| 28         | Kalakeri      | -    | √   | √   | -   | √   | √   | -   | √   | √   | -    | -  |
| 29         | Kali aus      | -    | PC  | PC  | -   | PC  | PC  | -   | -   | -   | -    | -  |
| 30         | Asanlaya      | -    | √   | -   | -   | -   | -   | -   | -   | -   | -    | -  |
| 31         | Lainakanda-41 | -    | √   | √   | -   | -   | -   | -   | -   | -   | -    | -  |
| 32         | Moroberekan   | -    | -   | -   | -   | -   | -   | -   | -   | -   | -    | -  |

\*PC, Positive check for the DTY QTL

**Table S4** Details of rice genotypes used in the present study

| Serial No.     | Name of cultivar              | Parentage                             | Year of Release | Released from | Area of adaptability                                            | Agro-ecology                         | Salient features <sup>b</sup>                                                                                                                                                  |
|----------------|-------------------------------|---------------------------------------|-----------------|---------------|-----------------------------------------------------------------|--------------------------------------|--------------------------------------------------------------------------------------------------------------------------------------------------------------------------------|
| 1 <sup>a</sup> | Abhishek (RR 272-829)         | Natural cross of CR 314-5-10 (mutant) | 2006            | CRURRS (NRRI) | CVRC, Uttar Pradesh, Bihar, Jharkhand, Assam                    | Irrigated                            | 120-125 days; intermediate height (95-110 cm); SB; yield, 4.5-5 tha <sup>-1</sup> ; resistant to rice blast; moderately resistant to brown spot and gall midge                 |
| 2              | Anjali (RR 347-166)           | Sneha / RR 149-1129                   | 2002            | CRURRS (NRRI) | CVRC, Uttar Pradesh, Bihar, Jharkhand, Assam, Tripura           | Rainfed upland                       | 90-95 days; intermediate height; SB; yield, 3.5 tha <sup>-1</sup> in favourable uplands; moderately resistant to rice blast and brown spot                                     |
| 3              | Annada (CR 222-MW-10)         | MTU-15 / Waikoku                      | 1987            | NRRI          | CVRC, Orissa, Madhya Pradesh, Manipur, Meghalaya, Nagaland, Goa | Rainfed upland and irrigated (early) | 105-110 days; intermediate height; SB; yield, 4.75 tha <sup>-1</sup> ; moderately resistant to rice blast; sheath blight                                                       |
| 4              | Apo (IR55423-01)              | UPLRi 5/ IR 12979-24-1 (BROWN)        | 2007            | IRRI          | Philippines                                                     | Aerobic                              | 115-120 days; intermediate height (105-110 cm); yield, 3.9 tha <sup>-1</sup> under aerobic condition; resistant to bacterial leaf blight; early vigour; drought tolerant       |
| 5              | ASD16                         | ADT 31/ Co 39                         | 1986            | TNAU          | CVRC, All India                                                 | Saline soils                         | 115 days; intermediate height (93 cm); SB; yield, 5.6 tha <sup>-1</sup> ; salinity tolerant; moderately resistant to brown plant hopper and sheath rot                         |
| 6              | Bala* (CR 42-38-173)          | N 22/ T(N) 1                          | 1970            | NRRI          | CVRC, All India                                                 | Rainfed upland                       | 105 days; semi-dwarf; SB; drought tolerant; moderately resistant to rice blast                                                                                                 |
| 7              | CR Dhan 103 (CRR 451-1-B-2-1) | Vandana/ IR 64                        | 2014            | CRURRS (NRRI) | Jharkhand (yet to be notified)                                  | Rainfed upland                       | 95 days; intermediate height; LS; yield, 2.5-3.0 tha <sup>-1</sup> ; drought tolerant; resistant to blast; moderately resistant to brown spot                                  |
| 8              | CR Dhan 40 (CRR 383-22)       | N 22/ RR 20-5                         | 2008            | CRURRS (NRRI) | CVRC, Jharkhand Maharashtra                                     | Upland and irrigated (early)         | 100 days; SB; yield, 3.0 -3.5 tha <sup>-1</sup> ; drought tolerant; resistant to gall midge; moderately resistant to rice blast, brown spot, sheath blight and leaf folder     |
| 9              | Dular                         | Dumai/ Larkoch                        | 1948            |               | West Bengal, India                                              | Rainfed upland                       | 100-105 days; intermediate height (105 cm); LB; yield, 1.8-2.0 tha <sup>-1</sup> ; drought tolerance associated with greater root length and root density (Henry et al., 2011) |
| 10             | Heera (CR 544-1-2)            | CR 404-48/ CR 289-1208                | 1991            | NRRI          | SVRC, Odisha                                                    | Rainfed upland                       | 70-75 days; semi-dwarf (70-75 cm); LB; yield, 2.5-3.5 tha <sup>-1</sup> ; resistant to rice blast, rice tungro and gall midge                                                  |
| 11             | Kalinga III (CR-237-1)        | AC-540/ Ratna                         | 1983            | NRRI          | SVRC, Odisha, Gujrat                                            | Rainfed upland                       | 75-80 days; intermediate height; LS; yield, 2.75-3.0 tha <sup>-1</sup> ; cold tolerant; moderately resistant to brown spot.                                                    |
| 12             | Nagina 22 (N22)               | Selection from Rajbhog                | 1978            |               | Uttar Pradesh                                                   | Rainfed upland                       | 90 days; intermediate height (110 cm); SB; drought and heat tolerant (Satake & Yoshida, 1978; Jagadish et al., 2008)                                                           |

|    |                                      |                                |         |               |                                                                                      |                     |                                                                                                                                                                                                                                                    |
|----|--------------------------------------|--------------------------------|---------|---------------|--------------------------------------------------------------------------------------|---------------------|----------------------------------------------------------------------------------------------------------------------------------------------------------------------------------------------------------------------------------------------------|
| 13 | Poornima (IET-12284)                 | Poorva/ IR-8608-298            | 1997    | IGKV          | SVRC, Madhya Pradesh, Chhattisgarh                                                   | Rainfed upland      | 110 days; intermediate height (90-100 cm); LS; yield, 3.5- 4.0 tha <sup>-1</sup>                                                                                                                                                                   |
| 14 | Rasi (IET1444/ RPCB 849)             | T(N)1/ Co 29                   | 1977    |               | CVRC, Andhra Pradesh, Orissa, Madhya Pradesh, Maharashtra, Tamil Nadu, Uttar Pradesh | Rainfed upland      | 115 days; intermediate height (90-95 cm); MB; yield, 3.0-3.5 tha <sup>-1</sup> ; resistant to rice blast; moderately resistant to rice tungro virus                                                                                                |
| 15 | Sadabahar (CR 306-37-13)             | BRR I SAIL/ IR 10181-58 -3-1   | 2004    | CRURRS (NRRI) | SVRC, Jharkhand                                                                      | Rainfed upland      | 105 days; LB; yield, 3.2 tha <sup>-1</sup> ; moderately resistant to sheath blight.                                                                                                                                                                |
| 16 | Sahbhagi Dhan (IR74371-70-1-1-CRR-1) | IR55419-04*2/ Way Rarem        | 2009    | CRURRS (NRRI) | CVRC, Orissa, Jharkhand                                                              | Drought-prone areas | 105 days; LB; yield, 3.8-4.5 tha <sup>-1</sup> and 1.0-2.0 tha <sup>-1</sup> under moderate and severe drought stress, respectively; resistant to leaf blast; moderately resistant to brown spot, sheath rot, sheath blight and leaf folder        |
| 17 | Sattari (CRM 13-3241)                | CR 113 (NSJ-200/ Padma) mutant | 1983    | NRRI          | CVRC, Orissa, West Bengal                                                            | Rainfed upland      | 72-75 days; semi-dwarf (65-70 cm); SB; yield, 2.5-3.0 tha <sup>-1</sup> ; being early often escapes diseases and pests                                                                                                                             |
| 18 | Shusk Samrat (NDR 1045-2)            | C 1064-5/ Kalakeri// IR 54     | 2006    | NDUAT         | CVRC, Bihar, Orissa, UP                                                              | Rainfed upland      | 100-105 days; intermediate height; LB; yield, 3.0-3.5 tha <sup>-1</sup> ; moderately resistance to brown spot, sheath blight and sheath rot                                                                                                        |
| 19 | Swarna (MTU 7029)                    | Vasista/ Mahsuri               | 1982    | ARS, Maruteru | SVRC, Andhra Pradesh (Later notified for All India)                                  | Rainfed Lowland     | 150 days; semi-dwarf; MS; yield, 6.5 tha <sup>-1</sup> ; Wide adaptability; Seed dormancy; High yielding low input response areas; a mega variety.                                                                                                 |
| 20 | UPLRI7                               | C 22/IR26//C22/OS4             | 1970    | UPLB          | Philippines                                                                          | Rainfed upland      | 110-115 days, intermediate height (95-100 cm); LB; yield, 3.5 tha <sup>-1</sup> (aerobic condition); resistant to rice blast, early vigour, drought tolerant.                                                                                      |
| 21 | Vanaprabha (CR 289-1045-16)          | ACR-12422/ ARC-12751           | 1988    | NRRI          | SVRC, Odisha                                                                         | Rainfed upland      | 90 days; intermediate height (115-120 cm); LS; yield, 3.0-3.5 tha <sup>-1</sup> ; resistant to rice blast and rice tungro.                                                                                                                         |
| 22 | Vandana (RR-197-962)                 | C-22/ Kalakeri                 | 2002    | CRURRS (NRRI) | SVRC, Bihar, Jharkhand, Orissa                                                       | Rainfed upland      | 90 days; tall, LB; yield, 2.5-3.0 tha <sup>-1</sup> and 3.5-4.5 tha <sup>-1</sup> under direct seeded & transplanted conditions, respectively; weed competitive; drought tolerant, deep root system; moderately resistant to blast and brown spot. |
| 23 | Virendra (CRR 347-2)                 | Sneha/RR 149-1129              | 2006    | CRURRS (NRRI) | CVRC, Odisha, Gujrat                                                                 | Rainfed upland      | 95 days; SB; yield, 2.75 tha <sup>-1</sup> ; resistant to gall midge; moderately resistant to blast and brown spot.                                                                                                                                |
| 24 | Way Rarem                            | IR 9669/ B 981                 | 1990-94 |               | Indonesia                                                                            | Rainfed upland      | 100-110 days; semi-dwarf (85-90 cm); yield, 2.97 tha <sup>-1</sup> .                                                                                                                                                                               |
| 25 | Bhutmuri                             | Landrace                       |         |               | West Bengal, India                                                                   | Rainfed upland      | 95 days; intermediate height (110 cm); LB; drought tolerant                                                                                                                                                                                        |
| 26 | AUS 257                              |                                |         |               | West Bengal, India                                                                   | Rainfed upland      | 90 days; intermediate height (110 cm); LB; drought tolerant                                                                                                                                                                                        |
| 27 | Black gora                           | Landrace                       |         |               | Jharkhand, India                                                                     | Rainfed upland      | 95 days; intermediate height (120 cm); LB; high seedling vigour (Redoña & Mackill, 1996) and deep roots (Shrestha et al., 2014)                                                                                                                    |

|    |               |          |  |  |                          |                |                                                                                                     |
|----|---------------|----------|--|--|--------------------------|----------------|-----------------------------------------------------------------------------------------------------|
| 28 | Kalakeri      | Landrace |  |  | Odisha, India            | Rainfed upland | 90 days; intermediate height (100 cm); LB; drought tolerant; deep rooted                            |
| 29 | Kali aus      | Landrace |  |  | India, Bangladesh        | Rainfed upland | 95 days; intermediate height (100 cm); LB; drought tolerant                                         |
| 30 | Asanlaya      | Landrace |  |  | West Bengal, India       | Rainfed upland | 95-100 days; intermediate height (110 cm); SB; drought tolerant                                     |
| 31 | Lalnakanda-41 | Landrace |  |  | Himachal Pradesh, India  | Rainfed upland | 100 days; intermediate height (110 cm); LB; drought tolerant                                        |
| 32 | Moroberekan   | Landrace |  |  | Ivory Coast, West Africa | Rainfed upland | 135 days; tall (130 cm); MB; resistant to rice blast; drought tolerant; deep and thick root system. |

<sup>a</sup>1-25, released varieties; 26-32, landraces

\*Denotified

<sup>b</sup>Characteristics of released varieties recorded from: <http://icar-nrri.in/released-varieties/> and <http://drdpat.bih.nic.in>

CRURRS: Central Rainfed Upland Rice Research Station, Hazaribag, Jharkhand, India; NRRI: ICAR-National Rice Research Institute, Cuttack, Odisha, India; IGKV: Indira Gandhi Krishi Viswavidyalaya, Raipur, Chhattisgarh, India; IRRI: International Rice Research Institute, Philippines; UPLB: University of Philippines, Los Baños, Philippines; VPKAS: ICAR-Vivekananda Parvatiya Krishi Anusandhan Sansthan, Almora, Uttarakhand, India; ARS, Maruteru: Regional Agricultural Research Station, Acharya N G Ranga Agricultural University, Andhra Pradesh, India; TNAU: Tamil Nadu Agricultural University, Coimbatore, TN, India; NDUAT: Narendra Deva University of Agriculture and Technology, Faizabad, Uttar Pradesh, India

Semi-dwarf: <90 cm; intermediate: 90-125 cm; tall: >125 cm (IRRI, 2013)

SB: short-bold; MB: medium-bold; LB: long-bold; LS: long-slender

## References

- IRRI (International Rice Research Institute) (2013) Standard evaluation system for rice (SES), 5th edn. International Rice Research Institute, Los Baños
- Jagadish, S. V. K., Muthurajan, R., Oane, R., Wheeler, T R., Heuer, S., Bennett, J., & Craufurd, P. Q. (2008). Physiological and proteomic approaches to address heat tolerance during anthesis in rice (*Oryza sativa* L.). *Journal of Experimental Botany*, 61, 143-156.
- Redoña, E. D., & Mackill, D. J. (1996). Mapping quantitative trait loci for seedling vigor in rice using RFLPs. *Theoretical and Applied Genetics*, 92, 395-402.
- Satake, T., & Yoshida, S. (1978). High Temperature-Induced Sterility in Indica Rices at Flowering. *Japanese Journal of Crop Science*, 47, 6-17.
- Shrestha, R., Al-Shugeairy, Z., Al-Ogaidi, F., Munasinghe, M., Radermacher, M., Vandenhirtz, J. & Price, A. H. (2014), Comparing simple root phenotyping methods on a core set of rice genotypes. *Plant Biology Journal*, 16, 632-642.

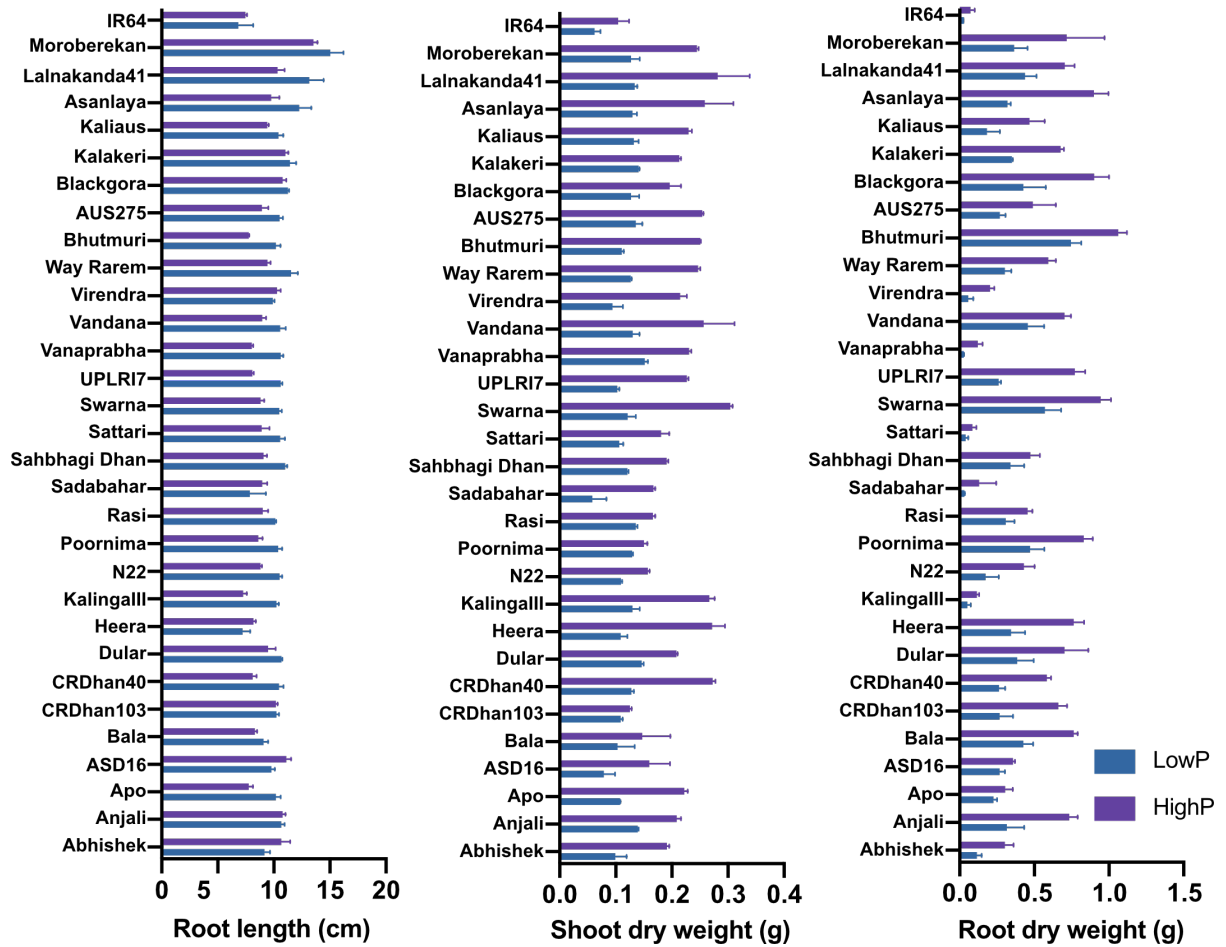

**Fig. S1** Effect of genotype and phosphorus treatment on root and shoot traits. Values are mean of three observations  $\pm$  SD. The figure was edited for presentation using Affinity Designer 1.9.3 (<https://affinity.serif.com/en-gb/>).
